# Supplementary material for: Designing a novel vacuum aspiration system to decellularize large-size enthesis with preservation of physicochemical and biological properties
Source: PubMed Central journal article supplement — Ann Transl Med. 2020 Nov;8(21):1364. doi: 10.21037/atm-20-3661 (PMC7723548; doi:10.21037/atm-20-3661), 2020-11
Supplement: atm-08-21-1364-supplementary.pdf [file atm-08-21-1364-supplementary.pdf]

**Table S1** Histological score system for the regenerated enthesis\*

| Individual outcomes                        | Score                     |                           |                           |                           |
|--------------------------------------------|---------------------------|---------------------------|---------------------------|---------------------------|
|                                            | 1                         | 2                         | 3                         | 4                         |
| Cellularity (inflammation)                 | Marked                    | Moderate                  | Mild                      | Minimal                   |
| Presence of fibrocytes (%)                 | <25                       | 26–50                     | 51–75                     | >75                       |
| Proportion of cells oriented parallel (%)  | <25                       | 26–50                     | 51–75                     | >75                       |
| Proportion of fibers oriented parallel (%) | <25                       | 26–50                     | 51–75                     | >75                       |
| Presence of matrix                         | Minimal                   | Mild                      | Moderate                  | Marked                    |
| Insertion integrity                        | C(+), R(-), F(-),<br>T(-) | C(+), R(+), F(-),<br>T(-) | C(+), R(+), F(+),<br>T(-) | C(+), R(+),<br>F(+), T(+) |
| Insertion continuity (%)                   | <25                       | 26–50                     | 51–75                     | >75                       |

\*, 7 Individual outcomes on a scale of 1 to 4. C means “continuity”, R means “regularity”, F means “fibrocartilage”, T means “tidemark”. Percentage was relative values as compared to unoperated native RC enthesis. RC, rotator cuff.

**Table S2** Primer sequences used for qRT-PCR analysis

| Gene          | Primer sequence                                   | Species |
|---------------|---------------------------------------------------|---------|
| <i>Runx-2</i> | Forward primer 5'-CGCCTCACAAACAACCACAG-3'         | Human   |
|               | Reverse primer 5'-GGTAGTGACCTGCGGAGATT-3'         |         |
| <i>Ocn</i>    | Forward primer 5'-CATGCCCTCCTCATCGC-3'            | Human   |
|               | Reverse primer 5'-ACCGCTGGGCTTCGCACC-3'           |         |
| <i>Sox-9</i>  | Forward primer 5'-TGGGCAAGCTCTGGAGACTTC-3'        | Human   |
|               | Reverse primer 5'-ATCCGGGTGGTCCTTCTTG-3'          |         |
| <i>Agg</i>    | Forward primer 5'-GGTCTACTGCCAACTACCC-3'          | Human   |
|               | Reverse primer 5'-CGATGCCTTTCACCACGACT-3'         |         |
| <i>Scx</i>    | Forward primer 5'-CCTGAACATCTGGGAAATTTAATTTTAC-3' | Human   |
|               | Reverse primer 5'-CGCCAAGGCACCTCCTT-3'            |         |

|              |                                              |       |
|--------------|----------------------------------------------|-------|
| <i>Tnmd</i>  | Forward primer 5'-TTTCTGACATAACTCCCGAGAGC-3' | Human |
|              | Reverse primer 5'-AGATATGGGCAGTTCGTTTCAGC-3' |       |
| <i>GAPDH</i> | Forward primer 5'-GGAGTCAACGGATTTGGTCGT-3'   | Human |
|              | Reverse primer 5'-GCTCCCGTTCTCAGCCTTGA-3'    |       |

qRT-PCR, quantitative real time-polymerase chain reaction.
